# Supplementary material for: Tumor oxygenation nanoliposomes promote deep photodynamic therapy for triple-negative breast cancer
Source: Royal Society of Chemistry journal article supplement (doi:10.1039/d4bm00847b), 2024-01-01
Supplement: d4bm00847b1.pdf [file d4bm00847b1.pdf]

## Supporting information

### EDS result of UCNP:

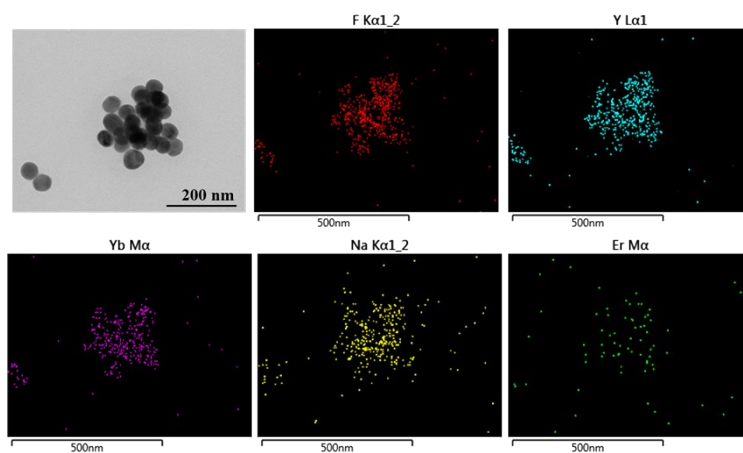

Fig. S1. EDS result of UCNP.

### TEM and DLS result of different nanoiposomes:

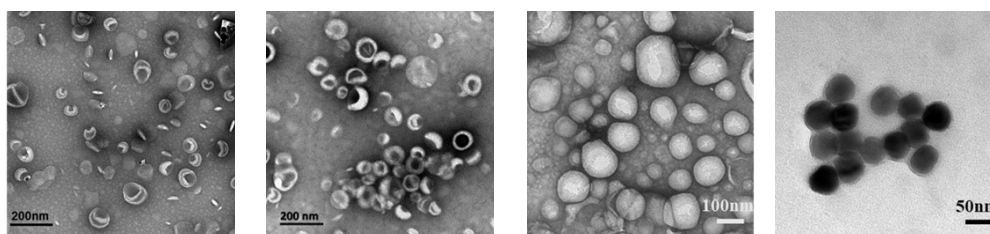

Fig. S2. TEM images of Blank LIP, LIP-RB, LIP-PFOB, LIP@UCNP.

Table S1. Average sizes and polydispersibility coefficients of different nanoliposomes.

|           | Blank LIP  | LIP@UCNP   | LIP-PFOB   | LIP-RB@UCNP | LIP-RB-PFOB@UCNP |
|-----------|------------|------------|------------|-------------|------------------|
| size (nm) | 58.61±2.43 | 55.35±1.05 | 93.92±5.25 | 69.18±1.04  | 246.2±3.6        |
| PDI (%)   | 28.1±0.6   | 24.9±0.6   | 26.0±1.6   | 25.1±1.8    | 23.4±0.4         |

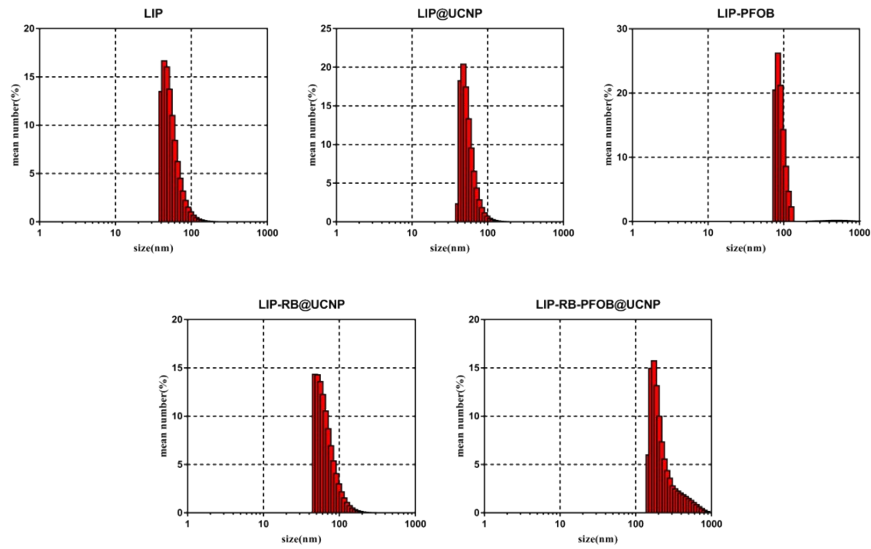

**Fig. S3.** Particle sizes of different nanoliposomes.

## TEM and DLS result of LIP-PFOB@UCNP with different PFOB volume proportion:

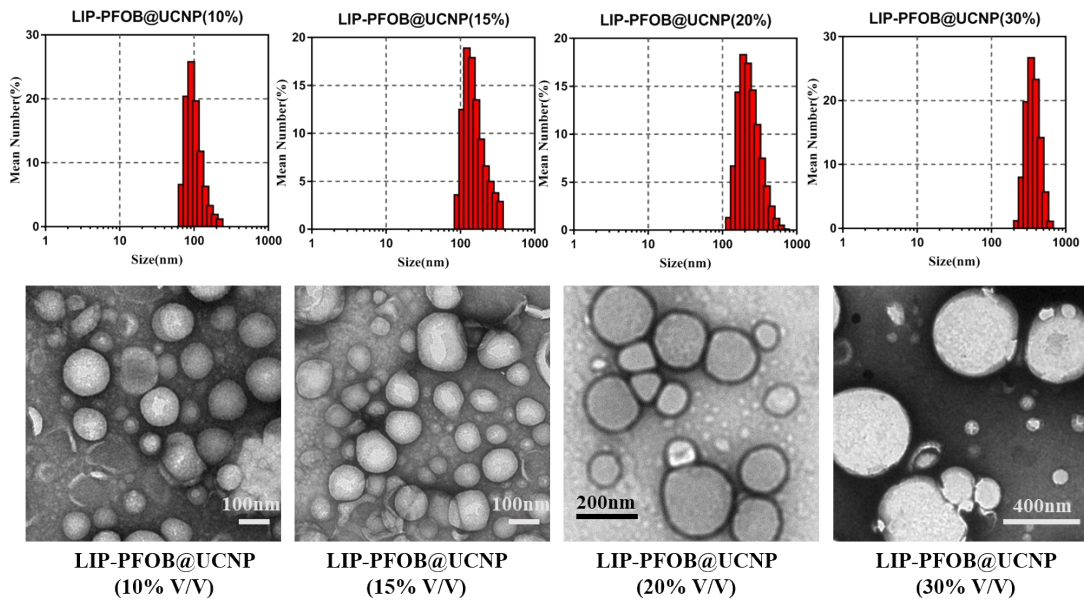

**Fig. S4.** Particle sizes and morphological structures of LIP-PFOB@UCNP with different PFOB volume proportion.

## Encapsulation efficiency and drug loading of RB and UCNP:

**Table S2.** Encapsulation efficiency and drug loading of RB and UCNP.

|                                 | <b>RB</b> | <b>UCNP</b> |
|---------------------------------|-----------|-------------|
| <b>Encapsulation Efficiency</b> | 33.46 %   | 9.43 %      |
| <b>Drug Loading</b>             | 3.35 %    | 1.57 %      |

### Synthesis route of CREKA-PEG-DSPE:

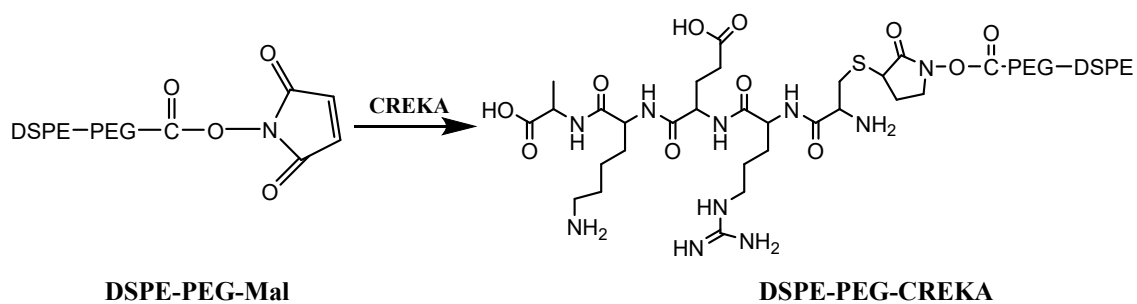

**Fig. S5.** Synthesis route of CREKA-PEG-DSPE.

### DLS, TEM, EDS and stability results of CLIP-RB-PFOB@UCNP:

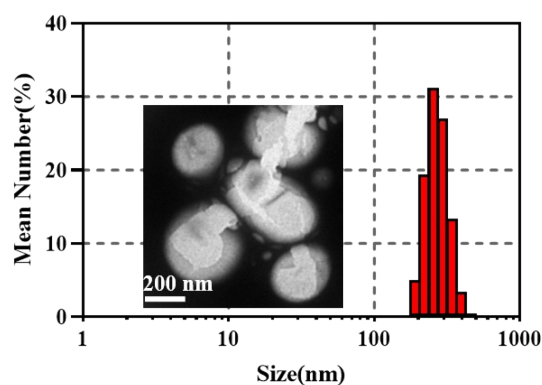

**Fig. S6.** Particle size and TEM image of CLIP-RB-PFOB@UCNP.

**Table S3.** Elemental analysis of CLIP-RB-PFOB@UCNP.

| Element | Wt%   | At%   |
|---------|-------|-------|
| CK      | 30.99 | 56.24 |
| OK      | 07.26 | 09.90 |
| FK      | 17.37 | 19.93 |
| NaK     | 05.53 | 05.24 |
| BrL     | 03.13 | 00.85 |
| YL      | 25.49 | 06.25 |
| ClK     | 00.46 | 00.29 |
| IL      | 01.60 | 00.28 |
| ErL     | 01.65 | 00.21 |
| YbL     | 06.51 | 00.82 |

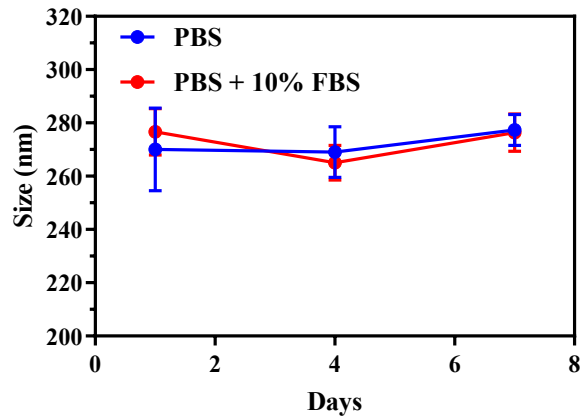**Fig. S7.** The size variations of CLIP-RB-PFOB@UCNP in different buffers.

### System stability results of RB:

**Table S4.** Encapsulation efficiency and drug loading of RB in CLIP-RB-PFOB@UCNP.

|              | Encapsulation Efficiency (%) | Drug Loading (%) |
|--------------|------------------------------|------------------|
| <b>Day 1</b> | 32.79                        | 3.18             |
| <b>Day 7</b> | 28.75                        | 2.80             |

**Table S5.** DPBF consumption of CLIP-RB-PFOB@UCNP.

|              | DPBF consumption after NIR irradiation for 2 min (%) |
|--------------|------------------------------------------------------|
| <b>Day 1</b> | 33.37                                                |
| <b>Day 7</b> | 31.45                                                |

### Release behaviors of RB:

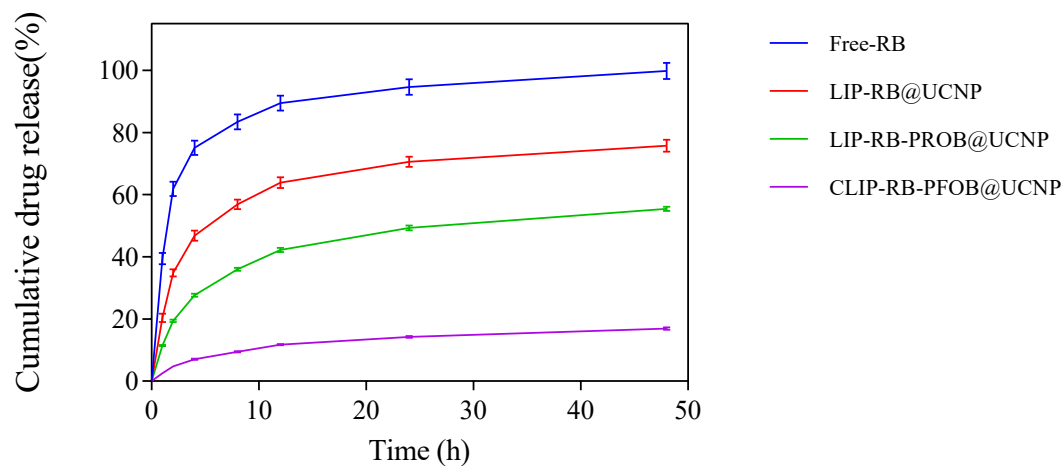

Fig. S8. The release behaviors of free RB, LIP-RB@UCNP, LIP-RB-PFOB@UCNP and CLIP-RB-PFOB@UCNP.

### Stability of CLIP-RB-PFOB@UCNP after loading oxygen:

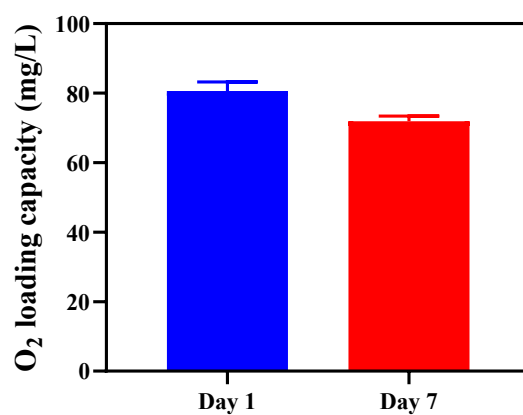

Fig. S9. The O<sub>2</sub> loading capacity of CLIP-RB-PFOB@UCNP.

### 4T1 cell viability:

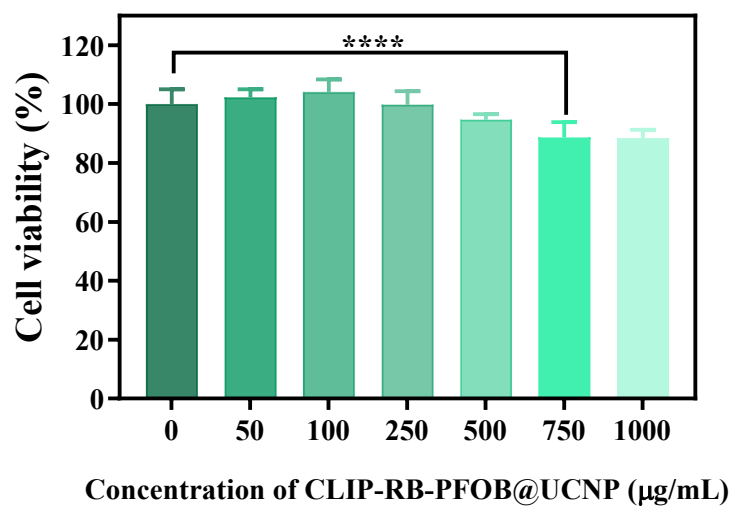

**Fig. S10.** 4T1 cell viability after incubating with CLIP-RB-PFOB@UCNP for 24 h.
